# Supplementary material for: Variations in VOCs Emissions and Their O3 and SOA Formation Potential among Different Ages of Plant Foliage
Source: MDPI journal article supplement (doi:10.3390/toxics11080645), 2023-07-25
Supplement: s1 [file s1]

Supplementary Materials

# Variations in VOCs Emissions and Their O<sub>3</sub> and SOA Formation Potential among Different Ages of Plant Foliage

Baowen Zhang, Lili Qiao, Huijuan Han, Wenxia Xie \* and Lingyu Li \*

College of Environmental Sciences and Engineering, Carbon Neutrality and Eco-Environmental Technology Innovation Center of Qingdao, Qingdao University, Qingdao 266071, China; zhangbaowen28@163.com (B.Z.); 13210158173@163.com (L.Q.); hanhuijuan2022@163.com (H.H.)

\* Correspondence: xwx080312@163.com (W.X.); lilingyu@qdu.edu.cn (L.L.)

**Citation:** Zhang, B.; Qiao, L.; Han, H.; Xie, W.; Li, L. Variations in VOCs Emissions and Their O<sub>3</sub> and SOA Formation Potential among Different Ages of Plant Foliage. *Toxics* **2023**, *11*, 645. <https://doi.org/10.3390/toxics11080645>

Academic Editor: Yuan Cheng

Received: 21 June 2023

Revised: 21 July 2023

Accepted: 22 July 2023

Published: 25 July 2023

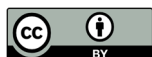

**Copyright:** © 2023 by the authors. Licensee MDPI, Basel, Switzerland. This article is an open access article distributed under the terms and conditions of the Creative Commons Attribution (CC BY) license (<https://creativecommons.org/licenses/by/4.0/>).

---

**Text S1.** Emission rate standardization.

Referring to Guenther et al. [28], the actual emission rates of each VOC's component were converted to the standard ones under the standard conditions of temperature=30°C and PAR=1000  $\mu\text{mol}/(\text{m}^2\cdot\text{s})$  using Equation (S1).

$$EF_{s,i} = EF_i \times \gamma_{P,i} \times \gamma_{T,i} \quad (\text{S1})$$

where  $EF_{s,i}$  is the emission rate at standard conditions;  $\mu\text{g}/(\text{g}\cdot\text{h})$ ;  $EF_i$  is the emission rate under the real environment of VOC<sub>i</sub>; and  $\mu\text{g}/(\text{g}\cdot\text{h})$ ,  $\gamma_{P,i}$ , and  $\gamma_{T,i}$  are dimensionless activity factors which correct for light and temperature conditions, respectively.

The PAR correction factor  $\gamma_{P,i}$  is calculated as follows.

$$\gamma_{P,i} = (1 - \text{LDF}_i) + \text{LDF}_i \times C_L \quad (\text{S2})$$

where  $\text{LDF}_i$  is the light-dependent fraction; it is 1 for isoprene; 0.6 for myrcene, sabinene, and  $\alpha$ -pinene; 0.2 for limonene, 3-carene, and  $\beta$ -pinene; 0.8 for trans- $\beta$ -ocimene; 0.4 for other monoterpenes; 0.5 for sesquiterpenes; and 0.2 for other VOCs.  $C_L$  is the light-dependent activity factor, calculated as Equation (S3).

$$C_L = \frac{\alpha C_{L1} L}{\sqrt{1 + \alpha^2 L^2}} \quad (\text{S3})$$

where  $L$  is the PAR,  $\mu\text{mol}/(\text{m}^2\cdot\text{s})$ ;  $\alpha$  is 0.0027; and  $C_{L1}$  is the empirical constant, 1.006. The temperature-correction factor  $\gamma_{T,i}$  is calculated as follows.

$$\gamma_{T,i} = (1 - \text{LDF}_i) \gamma + \text{LDF}_i \times C_T \quad (\text{S4})$$

where  $\text{LDF}_i$  is the light-dependent fraction;  $\gamma$  is calculated as Equation (S6); and  $C_T$  is the temperature-dependent activity factor, calculated as follows.

$$C_T = \frac{\exp\left[\frac{C_{T1}(T - T_s)}{RT_s T}\right]}{\left\{1 + \exp\left[\frac{C_{T2}(T - T_M)}{RT_s T}\right]\right\}} \quad (\text{S5})$$

where  $T$  is the leaf temperature, K;  $T_s$  is the leaf temperature at standard conditions, and it is 303 K;  $R$  is 8.314 J/(K·mol);  $C_{T1}$  is the empirically determined coefficient, and it is 95000 J/mol for isoprene, 80000 J/mol for monoterpene, 130000 J/mol for sesquiterpene, and 80000 J/mol for other VOCs;  $C_{T2}$  is 230000 J/mol; and  $T_M$  is 314 K.

$$\gamma = \exp[\beta(T - T_s)] \quad (\text{S6})$$

where  $\beta$  is the empirical constant, and it is 0.13 for isoprene, 0.1 for monoterpene, 0.17 for sesquiterpene, and 0.1 for other VOCs;  $T$  is the leaf temperature, K; and  $T_s$  is the leaf temperature at standard conditions, 303 K.

**Table S1.** Profile of pure standard samples, detection limits, analysis precision, and MIR and FAC values for each compound.

| Compound                | Classification | Detection limits<br>( $\mu\text{g}/\text{m}^3$ ) | Precision (%) | MIR<br>(g O <sub>3</sub> /g VOCs) | FAC (%) |
|-------------------------|----------------|--------------------------------------------------|---------------|-----------------------------------|---------|
| Isoprene                | Isoprene       | 0.21                                             | 4             | 10.61                             | 2       |
| Tricyclene              | Monoterpene    | 0.03                                             | 4             | 4.04                              | 30      |
| $\alpha$ -Pinene        | Monoterpene    | 0.42                                             | 9             | 4.51                              | 30      |
| Camphene                | Monoterpene    | 0.18                                             | 5             | 4.51                              | 30      |
| Sabinene                | Monoterpene    | 0.99                                             | 10            | 4.19                              | 30      |
| $\beta$ -Pinene         | Monoterpene    | 0.68                                             | 8             | 3.52                              | 30      |
| Myrcene                 | Monoterpene    | 0.18                                             | 4             | 4.04                              | 30      |
| $\alpha$ -Phellandrene  | Monoterpene    | 0.24                                             | 5             | 4.04                              | 30      |
| 3-Carene                | Monoterpene    | 0.25                                             | 4             | 3.24                              | 30      |
| $\alpha$ -Terpiene      | Monoterpene    | 0.18                                             | 4             | 4.04                              | 30      |
| Limonene                | Monoterpene    | 0.2                                              | 4             | 4.55                              | 30      |
| cis- $\beta$ -Ocimene   | Monoterpene    | 0.16                                             | 5             | 4.04                              | 30      |
| trans- $\beta$ -Ocimene | Monoterpene    | 0.05                                             | 4             | 4.04                              | 30      |
| $\gamma$ -Terpinene     | Monoterpene    | 0.17                                             | 4             | 4.04                              | 30      |
| Terpinolene             | Monoterpene    | 0.19                                             | 4             | 6.36                              | 30      |
| Isolongifolene          | Sesquiterpene  | 0.07                                             | 5             | 1.71                              | 18      |
| Longifolene             | Sesquiterpene  | 0.05                                             | 5             | 1.71                              | 18      |
| $\alpha$ -Cedrene       | Sesquiterpene  | 0.07                                             | 5             | 1.71                              | 18      |
| $\beta$ -Caryophyllene  | Sesquiterpene  | 0.05                                             | 4             | 1.71                              | 18      |
| Aromadendrene           | Sesquiterpene  | 0.15                                             | 7             | 1.71                              | 18      |
| $\alpha$ -Farnesene     | Sesquiterpene  | 0.09                                             | 3             | 1.71                              | 18      |
| Cyclopentane            | Alkane         | 0.18                                             | 10            | 2.39                              | 4       |
| 2,2-Dimethylbutane      | Alkane         | 0.14                                             | 8             | 1.17                              | 0       |
| 2,3-Dimethylbutane      | Alkane         | 0.39                                             | 5             | 0.97                              | 0       |
| 2,4-Dimethylpentane     | Alkane         | 0.52                                             | 7             | 1.55                              | 0.06    |
| 2,3-Dimethylpentane     | Alkane         | 0.31                                             | 8             | 1.34                              | 0.06    |
| 3-Methylhexane          | Alkane         | 0.29                                             | 7             | 1.61                              | 0.06    |
| n-Heptane               | Alkane         | 0.28                                             | 10            | 1.07                              | 0.06    |
| 2,3,4-Trimethylpentane  | Alkane         | 0.44                                             | 15            | 1.03                              | 0.73    |
| 2-Methylheptane         | Alkane         | 0.37                                             | 10            | 1.07                              | 0.5     |
| 3-Methylheptane         | Alkane         | 0.42                                             | 10            | 1.24                              | 0.5     |
| n-Octane                | Alkane         | 0.48                                             | 8             | 0.9                               | 0.06    |
| Methylcyclopentane      | Alkane         | 0.43                                             | 8             | 2.19                              | 0.17    |
| 3-Methylpentane         | Alkane         | 0.42                                             | 13            | 1.8                               | 0.17    |
| n-Hexane                | Alkane         | 0.2                                              | 9             | 1.24                              | 0       |
| 2,2,4-Trimethylpentane  | Alkane         | 0.19                                             | 9             | 1.26                              | 0.73    |
| n-Nonane                | Alkane         | 0.26                                             | 13            | 0.78                              | 1.5     |
| n-Decane                | Alkane         | 0.25                                             | 14            | 0.68                              | 2       |
| n-Undecane              | Alkane         | 0.85                                             | 8             | 0.61                              | 2.5     |
| Dodecane                | Alkane         | 0.31                                             | 10            | 0.55                              | 3       |
| Methylcyclohexane       | Alkane         | 0.4                                              | 8             | 1.7                               | 2.7     |
| Cyclohexane             | Alkane         | 0.41                                             | 6             | 1.25                              | 0.17    |
| 1-Hexene                | Alkene         | 0.34                                             | 3             | 5.49                              | -       |
| 1-Pentene               | Alkene         | 0.88                                             | 7             | 7.21                              | -       |
| trans-2-Pentene         | Alkene         | 0.26                                             | 5             | 10.56                             | -       |
| cis-2-Pentene           | Alkene         | 0.33                                             | 15            | 10.38                             | -       |
| Benzene                 | Aromatic       | 0.33                                             | 14            | 0.72                              | 2       |

---

|                         |          |      |    |       |     |
|-------------------------|----------|------|----|-------|-----|
| Toluene                 | Aromatic | 0.46 | 10 | 4     | 5.4 |
| Ethylbenzene            | Aromatic | 0.35 | 9  | 3.04  | 5.4 |
| m-Xylene                | Aromatic | 0.72 | 14 | 9.75  | 4.7 |
| p-Xylene                | Aromatic | 0.72 | 14 | 5.84  | 1.6 |
| o-Xylene                | Aromatic | 0.35 | 9  | 7.64  | 5   |
| n-Propylbenzene         | Aromatic | 0.27 | 5  | 2.03  | 1.6 |
| Styrene                 | Aromatic | 0.25 | 5  | 1.73  | 5.7 |
| iso-Propylbenzene       | Aromatic | 0.32 | 7  | 2.52  | 4   |
| m-Ethyltoluene          | Aromatic | 0.36 | 5  | 7.39  | 6.3 |
| p-Ethyltoluene          | Aromatic | 0.33 | 13 | 4.44  | 2.5 |
| 1,3,5-Trimethylbenzene  | Aromatic | 0.36 | 13 | 11.76 | 2.9 |
| o-Ethyltoluene          | Aromatic | 0.27 | 5  | 5.59  | 5.6 |
| 1,2,4- Trimethylbenzene | Aromatic | 0.25 | 4  | 8.87  | 2   |
| 1,2,3- Trimethylbenzene | Aromatic | 0.25 | 4  | 11.97 | 3.6 |
| m-Diethylbenzene        | Aromatic | 0.23 | 4  | 7.1   | 6.3 |
| p-Diethylbenzene        | Aromatic | 0.2  | 4  | 4.43  | 6.3 |

---

Note: MIR is the maximum incremental reactivity of VOCs. FAC is the aerosol formation coefficient of the VOCs. MIR values are from study [29], FAC values are from studies [30,31].

**Table S2.** Compound-specific emission rates from the young, mature, and senescent leaves of *Ginkgo biloba*, *Ligustrum lucidum*, and *Forsythia suspensa* (Units:  $\mu\text{g}/(\text{g}\cdot\text{h})$ ; ND: not detected).

| Emission rate           | <i>Ginkgo biloba</i> |                   |                   | <i>Ligustrum lucidum</i> |                   |                   | <i>Forsythia suspensa</i> |                   |                   |
|-------------------------|----------------------|-------------------|-------------------|--------------------------|-------------------|-------------------|---------------------------|-------------------|-------------------|
|                         | Young leaves         | Mature leaves     | Senescent leaves  | Young leaves             | Mature leaves     | Senescent leaves  | Young leaves              | Mature leaves     | Senescent leaves  |
| Isoprene                | 0.0071±0.0<br>017    | 0.0068±0.0<br>03  | 0.0130±0.0<br>023 | 0.0592±0.01<br>42        | 0.0086±0.00<br>22 | 0.0113±0.00<br>26 | 0.1319±0.0<br>167         | 0.0205±0.0<br>058 | 0.0118±0.0<br>023 |
| Tricyclene              | 0.2768±0.1<br>190    | 0.0004±0.0<br>001 | 0.0004±0.0<br>001 | 0.2343±0.08<br>12        | 0.001±0.000<br>4  | 0.0022±0.00<br>15 | 0.3723±0.1<br>353         | 0.0006±0.0<br>001 | 0.0007±0.0<br>002 |
| $\alpha$ -Pinene        | 0.0010±0.0<br>001    | 0.2506±0.0<br>024 | 0.1019±0.0<br>222 | 0.0261±0.01<br>40        | 0.2175±0.00<br>80 | 0.7232±0.19<br>07 | 0.0032±0.0<br>004         | 0.422±0.00<br>4   | 0.2645±0.0<br>902 |
| Camphene                | 0.0005±0.0<br>002    | 0.0017±0.0<br>005 | 0.0043±0.0<br>005 | 0.0006±0.00<br>02        | 0.0048±0.00<br>18 | 0.0251±0.01<br>11 | 0.004±0.00<br>12          | 0.0033±0.0<br>006 | 0.0104±0.0<br>034 |
| Sabinene                | 0.1230±0.0<br>545    | 0.4741±0.0<br>001 | ND                | 0.0775±0.00<br>01        | 0.4094±0.01<br>67 | 0.2201±0.00<br>01 | 0.1652±0.0<br>554         | 0.7911±0.0<br>401 | ND                |
| $\beta$ -Pinene         | 0.0012±0.0<br>001    | 0.4297±0.0<br>033 | 0.0996±0.0<br>009 | 0.0004±0.00<br>03        | 0.3707±0.01<br>39 | 0.1749±0.03<br>36 | 0.0049±0.0<br>027         | 0.7229±0.0<br>083 | 0.0991±0.0<br>248 |
| Myrcene                 | 0.7300±0.3<br>138    | 0.3788±0.0<br>039 | 0.1462±0.0<br>011 | 0.6249±0.22<br>58        | 0.3267±0.01<br>24 | 0.0861±0.00<br>90 | 0.9673±0.3<br>202         | 0.6370±0.0<br>068 | 0.1139±0.0<br>079 |
| $\alpha$ -Phellandrene  | 0.0014±0.0<br>010    | 0.2697±0.0<br>029 | 0.0384±0.0<br>093 | 0.0002±0.00<br>01        | 0.2333±0.00<br>84 | 0.0247±0.00<br>86 | 0.0051±0.0<br>010         | 0.4545±0.0<br>049 | 0.0172±0.0<br>034 |
| 3-Carene                | 0.0005±0.0<br>004    | 0.0002±0.0<br>001 | 0.0032±0.0<br>007 | 0.0015±0.00<br>15        | 0.0052±0.00<br>31 | 0.0162±0.00<br>74 | 0.0030±0.0<br>017         | 0.0003±0.0<br>001 | 0.0025±0.0<br>006 |
| $\alpha$ -Terpiene      | 0.8603±0.3<br>591    | 0.5262±0.0<br>054 | 0.5699±0.0<br>047 | 0.7310±0.26<br>72        | 0.4521±0.01<br>74 | 0.3171±0.01<br>09 | 1.1131±0.3<br>712         | 0.8862±0.0<br>101 | 0.4354±0.0<br>264 |
| Limonene                | 0.0025±0.0<br>001    | 0.2715±0.0<br>043 | 0.0632±0.0<br>105 | ND                       | 0.2393±0.00<br>95 | 0.0410±0.01<br>99 | 0.0094±0.0<br>032         | 0.4592±0.0<br>042 | 0.0283±0.0<br>018 |
| cis- $\beta$ -Ocimene   | 0.4494±0.1<br>970    | 0.1879±0.0<br>027 | ND                | 0.3715±0.11<br>93        | 0.1636±0.00<br>57 | ND                | 0.6111±0.2<br>004         | 0.3173±0.0<br>032 | ND                |
| trans- $\beta$ -Ocimene | 0.3054±0.1<br>283    | 0.1229±0.0<br>011 | 0.0626±0.0<br>004 | 0.2617±0.09<br>51        | 0.1076±0.00<br>42 | 0.0361±0.00<br>19 | 0.4060±0.1<br>336         | 0.2065±0.0<br>023 | 0.0488±0.0<br>032 |
| $\gamma$ -Terpinene     | 0.8327±0.2<br>138    | ND                | 0.0009±0.0<br>003 | 0.6008±0.00<br>01        | ND                | 0.0024±0.00<br>08 | 1.0825±0.3<br>689         | ND                | 0.0019±0.0<br>005 |

|                        |            |            |            |             |             |             |            |            |            |
|------------------------|------------|------------|------------|-------------|-------------|-------------|------------|------------|------------|
| Terpinolene            | 1.1592±0.2 | 0.0008±0.0 | 0.0032±0.0 | 0.9940±0.36 | 0.0010±0.00 | 0.0176±0.00 | 1.5118±0.5 | 0.002±0.00 | 0.0040±0.0 |
|                        | 910        | 003        | 012        | 38          | 05          | 70          | 045        | 06         | 006        |
| Isolongifolene         | 0.4333±0.2 | 0.0021±0.0 | ND         | 0.3859±0.14 | 0.0004±0.00 | ND          | 0.5759±0.2 | 0.0007±0.0 | ND         |
|                        | 164        | 002        | ND         | 20          | 01          | ND          | 035        | 001        | ND         |
| Longifolene            | 0.3241±0.1 | ND         | ND         | 0.2890±0.10 | ND          | 0.0350±0.01 | 0.4357±0.1 | 0.1648±0.0 | ND         |
|                        | 604        | ND         | ND         | 47          | ND          | 59          | 491        | 001        | ND         |
| α-Cedrene              | 0.3846±0.1 | 0.0503±0.0 | ND         | 0.3426±0.12 | 0.0436±0.00 | ND          | 0.5114±0.1 | 0.0833±0.0 | ND         |
|                        | 921        | 009        | ND         | 58          | 29          | ND          | 811        | 015        | ND         |
| β-Caryophyllene        | 0.5561±0.1 | 0.0973±0.0 | ND         | 0.6060±0.21 | 0.0894±0.01 | ND          | 0.9609±0.2 | 0.1591±0.0 | ND         |
|                        | 328        | 022        | ND         | 06          | 03          | ND          | 885        | 049        | ND         |
| Aromadendrene          | 0.7840±0.0 | 0.1278±0.0 | 0.0123±0.0 | 0.5049±0.21 | 0.1131±0.00 | 0.0050±0.00 | 0.7104±0.2 | 0.2173±0.0 | 0.0063±0.0 |
|                        | 745        | 029        | 018        | 11          | 77          | 07          | 516        | 047        | 008        |
| α-Farnesene            | 0.6824±0.3 | 0.0873±0.0 | ND         | 0.6435±0.26 | 0.0748±0.00 | ND          | 0.9238±0.3 | 0.1406±0.0 | ND         |
|                        | 692        | 032        | ND         | 85          | 46          | ND          | 307        | 025        | ND         |
| Cyclopentane           | ND         | 0.0048±0.0 | 0.0042±0.0 | ND          | 0.0212±0.00 | ND          | ND         | 0.0326±0.0 | ND         |
|                        | ND         | 012        | 009        | ND          | 27          | ND          | ND         | 082        | ND         |
| 2,2-Dimethylbutane     | ND         | ND         | 0.0512±0.0 | ND          | 0.0118±0.00 | 0.0159±0.00 | ND         | ND         | 0.0361±0.0 |
|                        | ND         | ND         | 081        | ND          | 66          | 61          | ND         | ND         | 044        |
| 2,3-Dimethylbutane     | ND         | 0.0639±0.0 | ND         | ND          | 0.0514±0.04 | 0.0003±0.00 | ND         | 0.0555±0.0 | ND         |
|                        | ND         | 001        | ND         | ND          | 47          | 01          | ND         | 028        | ND         |
| 2,4-Dimethylpentane    | ND         | 0.0587±0.0 | 0.0248±0.0 | ND          | 0.0106±0.00 | 0.0284±0.01 | ND         | 0.1474±0.0 | 0.0519±0.0 |
|                        | ND         | 068        | 081        | ND          | 28          | 06          | ND         | 062        | 083        |
| 2,3-Dimethylpentane    | ND         | ND         | ND         | ND          | 0.0183±0.00 | 0.0606±0.02 | ND         | ND         | 0.0094±0.0 |
|                        | ND         | ND         | ND         | ND          | 75          | 61          | ND         | ND         | 019        |
| 3-Methylhexane         | ND         | ND         | ND         | ND          | ND          | 0.1217±0.00 | ND         | ND         | ND         |
|                        | ND         | ND         | ND         | ND          | ND          | 01          | ND         | ND         | ND         |
| n-Heptane              | ND         | ND         | ND         | ND          | ND          | ND          | ND         | 0.1852±0.0 | ND         |
|                        | ND         | ND         | ND         | ND          | ND          | ND          | ND         | 115        | ND         |
| 2,3,4-Trimethylpentane | ND         | ND         | ND         | ND          | ND          | ND          | ND         | ND         | ND         |
|                        | ND         | ND         | ND         | ND          | ND          | ND          | ND         | ND         | ND         |
| 2-Methylheptane        | ND         | ND         | ND         | ND          | ND          | ND          | 0.0701±0.0 | ND         | ND         |
|                        | ND         | ND         | ND         | ND          | ND          | ND          | 001        | ND         | ND         |
| 3-Methylheptane        | ND         | 0.0664±0.0 | ND         | ND          | ND          | 0.0068±0.00 | ND         | 0.1095±0.0 | ND         |
|                        | ND         | 135        | ND         | ND          | ND          | 04          | ND         | 131        | ND         |

|                        |               |               |               |               |               |               |               |               |               |
|------------------------|---------------|---------------|---------------|---------------|---------------|---------------|---------------|---------------|---------------|
| n-Octane               | 0.0712±0.0155 | ND            | ND            | ND            | 0.0872±0.0094 | ND            | 0.0426±0.0001 | ND            | ND            |
| Methylcyclopentane     | 0.1278±0.0585 | 0.0190±0.0001 | ND            | ND            | 0.0077±0.0059 | 0.0119±0.0001 | 0.1636±0.0474 | 0.0297±0.0057 | 0.0029±0.0007 |
| 3-Methylpentane        | 0.0318±0.0001 | ND            | 0.0052±0.0013 | ND            | 0.0018±0.0004 | 0.0079±0.0022 | ND            | 0.0051±0.0017 | 0.0199±0.0036 |
| n-Hexane               | ND            | 0.0230±0.0117 | ND            | ND            | 0.0442±0.0134 | ND            | ND            | 0.0807±0.0188 | ND            |
| 2,2,4-Trimethylpentane | ND            | 0.0056±0.0001 | ND            | 0.0115±0.0001 | 0.0032±0.0013 | 0.0254±0.0017 | ND            | ND            | ND            |
| n-Nonane               | ND            | 0.0026±0.0019 | ND            | ND            | 0.0005±0.0002 | ND            | ND            | ND            | ND            |
| n-Decane               | 0.3090±0.0639 | 0.0055±0.0020 | ND            | ND            | ND            | ND            | 0.2587±0.0001 | 0.0077±0.0012 | 0.0325±0.0001 |
| n-Undecane             | 0.4382±0.0638 | 0.0079±0.0025 | ND            | ND            | ND            | ND            | 0.5608±0.1916 | 0.0127±0.0005 | 0.0546±0.0001 |
| Dodecane               | 0.9658±0.0001 | ND            | ND            | 0.7227±0.3162 | ND            | ND            | 0.8322±0.2589 | 0.0032±0.0001 | ND            |
| Methylcyclohexane      | ND            | 0.0095±0.0065 | ND            | ND            | ND            | ND            | 1.3156±0.3891 | ND            | ND            |
| Cyclohexane            | ND            |
| 1-Hexene               | ND            | ND            | 0.0006±0.0002 | ND            | ND            | 0.0019±0.0005 | ND            | 0.0135±0.0001 | 0.0010±0.0003 |
| 1-Pentene              | ND            | 0.0048±0.0012 | 0.0042±0.0009 | ND            | 0.0212±0.0027 | ND            | ND            | 0.0326±0.0082 | ND            |
| trans-2-Pentene        | 0.6930±0.0001 | ND            | ND            | ND            | ND            | ND            | ND            | 0.1572±0.0001 | ND            |
| cis-2-Pentene          | ND            |
| Benzene                | ND            |
| Toluene                | ND            | 0.0185±0.0032 | ND            | ND            | 0.0075±0      | 0.0056±0.0012 | ND            | 0.0141±0.0005 | ND            |
| Ethylbenzene           | 0.1117±0.0012 | 0.0154±0.0032 | ND            | 0.0647±0.0001 | 0±0           | 0±0           | 0.1309±0.0491 | 0.0357±0.0009 | ND            |

[illegible]



**Table S3.** Changes in VOC emission rates between leaves of different ages for *Ginkgo biloba*, *Ligustrum lucidum*, and *Forsythia suspensa* (Compared with the previous growth stage) (Units: %).

| Plant                     | Compound       | Young leaves | Mature leaves | Senescent leaves |
|---------------------------|----------------|--------------|---------------|------------------|
| <i>Ginkgo biloba</i>      | Total VOCs     | —            | −68.29        | −69.23           |
|                           | Isoprene       | —            | −4.23         | 91.10            |
|                           | Monoterpenes   | —            | −38.51        | −62.11           |
|                           | Sesquiterpenes | —            | −88.47        | −96.63           |
|                           | Other VOCs     | —            | −85.79        | −83.37           |
| <i>Ligustrum lucidum</i>  | Total VOCs     | —            | −62.79        | −35.16           |
|                           | Isoprene       | —            | −85.55        | 31.37            |
|                           | Monoterpenes   | —            | −36.22        | −33.17           |
|                           | Sesquiterpenes | —            | −88.41        | −87.55           |
|                           | Other VOCs     | —            | −83.90        | 9.20             |
| <i>Forsythia suspensa</i> | Total VOCs     | —            | −53.64        | −82.36           |
|                           | Isoprene       | —            | −84.46        | −42.63           |
|                           | Monoterpenes   | —            | −22.96        | −78.91           |
|                           | Sesquiterpenes | —            | −81.40        | −99.18           |
|                           | Other VOCs     | —            | −70.63        | −85.25           |

**Table S4.** Changes in VOCs' emission composition between leaves of different ages for *Ginkgo biloba*, *Ligustrum lucidum*, and *Forsythia suspensa* (Compared with the previous growth stage) (Units: %).

| Plant                     | Compound       | Young leaves | Mature leaves | Senescent leaves |
|---------------------------|----------------|--------------|---------------|------------------|
| <i>Ginkgo biloba</i>      | Isoprene       | —            | 0.12          | 0.90             |
|                           | Monoterpenes   | —            | 36.12         | 17.26            |
|                           | Sesquiterpenes | —            | −16.30        | −8.29            |
|                           | Other VOCs     | —            | −19.82        | −8.97            |
| <i>Ligustrum lucidum</i>  | Isoprene       | —            | −0.43         | 0.28             |
|                           | Monoterpenes   | —            | 33.84         | 2.49             |
|                           | Sesquiterpenes | —            | −22.71        | −8.30            |
|                           | Other VOCs     | —            | −11.13        | 5.81             |
| <i>Forsythia suspensa</i> | Isoprene       | —            | −0.57         | 0.65             |
|                           | Monoterpenes   | —            | 27.61         | 13.55            |
|                           | Sesquiterpenes | —            | −16.10        | −10.28           |
|                           | Other VOCs     | —            | −11.51        | −3.26            |

**Table S5.** Changes in OFP between leaves of different ages for *Ginkgo biloba*, *Ligustrum lucidum*, and *Forsythia suspensa* (Compared with the previous growth stage) (Units: %).

| Plant                     | Compound       | Young leaves | Mature leaves | Senescent leaves |
|---------------------------|----------------|--------------|---------------|------------------|
| <i>Ginkgo biloba</i>      | Total VOCs     | —            | −67.76        | −65.28           |
|                           | Isoprene       | —            | −4.23         | 91.10            |
|                           | Monoterpenes   | —            | −45.68        | −62.51           |
|                           | Sesquiterpenes | —            | −88.47        | −96.63           |
|                           | Other VOCs     | —            | −92.04        | −85.27           |
| <i>Ligustrum lucidum</i>  | Total VOCs     | —            | −62.01        | −32.13           |
|                           | Isoprene       | —            | −85.55        | 31.37            |
|                           | Monoterpenes   | —            | −43.23        | −30.67           |
|                           | Sesquiterpenes | —            | −88.41        | −87.55           |
|                           | Other VOCs     | —            | −93.03        | −10.83           |
| <i>Forsythia suspensa</i> | Total VOCs     | —            | −50.88        | −81.51           |
|                           | Isoprene       | —            | −84.46        | −42.63           |
|                           | Monoterpenes   | —            | −30.65        | −78.76           |
|                           | Sesquiterpenes | —            | −81.40        | −99.18           |
|                           | Other VOCs     | —            | −74.06        | −92.74           |

**Table S6.** Changes in OFP contributions between leaves of different ages for *Ginkgo biloba*, *Ligustrum lucidum*, and *Forsythia suspensa* (Compared with the previous growth stage) (Units: %).

| Plant                     | Compound       | Young leaves | Mature leaves | Senescent leaves |
|---------------------------|----------------|--------------|---------------|------------------|
| <i>Ginkgo biloba</i>      | Isoprene       | —            | 0.35          | 2.35             |
|                           | Monoterpenes   | —            | 34.97         | 6.87             |
|                           | Sesquiterpenes | —            | −8.12         | −4.08            |
|                           | Other VOCs     | —            | −27.20        | −5.14            |
| <i>Ligustrum lucidum</i>  | Isoprene       | —            | −1.30         | 0.74             |
|                           | Monoterpenes   | —            | 29.92         | 1.94             |
|                           | Sesquiterpenes | —            | −10.96        | −3.93            |
|                           | Other VOCs     | —            | −17.67        | 1.25             |
| <i>Forsythia suspensa</i> | Isoprene       | —            | −1.87         | 1.82             |
|                           | Monoterpenes   | —            | 23.23         | 11.86            |
|                           | Sesquiterpenes | —            | −8.56         | −4.98            |
|                           | Other VOCs     | —            | −12.80        | −8.70            |

**Table S7.** Changes in SOAP between leaves of different ages for *Ginkgo biloba*, *Ligustrum lucidum*, and *Forsythia suspensa* (Compared with the previous growth stage) (Units: %).

| Plant                     | Compound       | Young leaves | Mature leaves | Senescent leaves |
|---------------------------|----------------|--------------|---------------|------------------|
| <i>Ginkgo biloba</i>      | Total VOCs     | —            | −54.46        | −65.24           |
|                           | Isoprene       | —            | −4.23         | 91.10            |
|                           | Monoterpenes   | —            | −38.56        | −62.47           |
|                           | Sesquiterpenes | —            | −88.47        | −96.63           |
|                           | Other VOCs     | —            | −84.49        | −87.77           |
| <i>Ligustrum lucidum</i>  | Total VOCs     | —            | −52.52        | −37.18           |
|                           | Isoprene       | —            | −85.55        | 31.37            |
|                           | Monoterpenes   | —            | −35.48        | −33.39           |
|                           | Sesquiterpenes | —            | −88.41        | −87.55           |
|                           | Other VOCs     | —            | −97.54        | −15.78           |
| <i>Forsythia suspensa</i> | Total VOCs     | —            | −40.41        | −80.90           |
|                           | Isoprene       | —            | −84.46        | −42.63           |
|                           | Monoterpenes   | —            | −21.67        | −79.06           |
|                           | Sesquiterpenes | —            | −81.40        | −99.18           |
|                           | Other VOCs     | —            | −78.35        | −88.56           |

**Table S8.** Changes in SOAP contribution between leaves of different ages for *Ginkgo biloba*, *Ligustrum lucidum*, and *Forsythia suspensa* (Compared with the previous growth stage) (Units: %).

| Plant                     | Compound       | Young leaves | Mature leaves | Senescent leaves |
|---------------------------|----------------|--------------|---------------|------------------|
| <i>Ginkgo biloba</i>      | Isoprene       | —            | 0.01          | 0.06             |
|                           | Monoterpenes   | —            | 23.64         | 7.27             |
|                           | Sesquiterpenes | —            | −20.24        | −6.20            |
|                           | Other VOCs     | —            | −3.40         | −1.14            |
| <i>Ligustrum lucidum</i>  | Isoprene       | —            | −0.05         | 0.02             |
|                           | Monoterpenes   | —            | 24.51         | 5.59             |
|                           | Sesquiterpenes | —            | −21.87        | −5.66            |
|                           | Other VOCs     | —            | −2.59         | 0.05             |
| <i>Forsythia suspensa</i> | Isoprene       | —            | −0.07         | 0.05             |
|                           | Monoterpenes   | —            | 21.52         | 8.67             |
|                           | Sesquiterpenes | —            | −18.57        | −8.07            |
|                           | Other VOCs     | —            | −2.87         | −0.66            |

**Disclaimer/Publisher’s Note:** The statements, opinions and data contained in all publications are solely those of the individual author(s) and contributor(s) and not of MDPI and/or the editor(s). MDPI and/or the editor(s) disclaim responsibility for any injury to people or property resulting from any ideas, methods, instructions or products referred to in the content.
